# Supplementary material
Source: PubMed Central journal article supplement (PMC5142115)
Supplement: mmc1.pdf [file mmc1.pdf]

## **Supplemental Data**

### **Mutations in Three Genes Encoding Proteins**

#### **Involved in Hair Shaft Formation**

#### **Cause Uncombable Hair Syndrome**

**F. Buket Ü. Basmanav, Laura Cau, Aylar Tafazzoli, Marie-Claire Méchin, Sabrina Wolf, Maria Teresa Romano, Frederic Valentin, Henning Wiegmann, Anne Huchénq, Rima Kandil, Natalie Garcia Bartels, Arzu Kilic, Susannah George, Damian J. Ralser, Stefan Bergner, David J.P. Ferguson, Ana-Maria Oprisoreanu, Maria Wehner, Holger Thiele, Janine Altmüller, Peter Nürnberg, Daniel Swan, Darren Houniet, Aline Büchner, Lisa Weibel, Nicola Wagner, Ramon Grimalt, Anette Bygum, Guy Serre, Ulrike Blume-Peytavi, Eli Sprecher, Susanne Schoch, Vinzenz Oji, Henning Hamm, Paul Farrant, Michel Simon, and Regina C. Betz**

## Supplemental Note: Case Reports

### Clinical data for individuals with *PADI3* mutations

The English family has also been described in the manuscript. The female sibling was referred to the Department of Dermatology in Brighton at the age of 11 years with a lump in her right and left arm. The clinical and later histological diagnosis was of pilomatrixomas. At the same appointment it was noted that she had abnormal hair. This was first noticed by the parents after 8 weeks of hair shedding in early childhood. The hair was then very slow growing, came out easily and painlessly. Her hair was hard to brush or comb and she rarely had to have her hair cut. Teeth and nail development was normal. The girl has recently been diagnosed as diabetic. Her brother was examined at the age of 15 years and had white brittle nails. His hair when long was described as being like sheeps wool which had improved with age (Figure 1J). The hair had a spangly appearance. The features of the hair shaft observed by electron microscopy were diagnostic of uncombable hair with longitudinal running ridges (Figure 1K), some twisting and triangular or heart shaped cross sections (Figure 1L).

A 3-year old Danish girl was referred for evaluation of abnormal hair (Figure 1F). Besides hair shaft anomaly she was otherwise healthy. From birth she had sparse hair until the age of 1.5 years, when the parents noted her dry and unruly hair which could not be properly combed. It was also noted that she could never grow her hair long. Hair microscopy showed hair shaft anomalies with pili canaliculi et trianguli. When she was 4 years old biotin therapy 5 mg daily was given for 6 months, which apparently improved the hair texture. Today the girl is 8 years old, and overall there has been also a spontaneous improvement of the condition (Figure 1G). This clinical signs of this girl have been described in detail elsewhere.<sup>1</sup>

A German boy was seen at the age of 3 and 8 years with unimproved wiry hair. The blond, lusterless hair was closely cropped and irregularly stuck out from the scalp growing in lots of different directions. Of interest, the hair originating from a congenital melanocytic nevus of 2.5 x 1.5 cm size at the right temporal side of the scalp was not only darker but also appeared structurally normal without any signs of uncombability (Figure 1D).

An 18-month old Swiss boy was referred to the Department of Dermatology in Zurich for the evaluation of abnormal hair. From early infancy the parents noted dry, unruly and slow growing hair which did not maintain its shape after styling. Apart from mild obstipation he was otherwise well. No one else in the family had any similar hair problems. On examination the boy's entire scalp was observed to be covered with brown, dry, frizzy hair that projected outward and resisted any attempt to flatten it. On hair shaft microscopy longitudinal grooving and triangular cross sections were observed, consistent with pili canaliculi et trianguli. Today the boy is nearly 6 years old, and there is an improvement in the hair phenotype (Figure 1E).

A Spanish girl was seen at the age of 4 years for 'funny looking' hair. Clinical examination revealed normal brown light hair without any clear alteration on eyelashes nor eyebrows. Teeth and nails are normal. Under the scanning and optical microscope typical finding of pili canaliculi were seen. This clinical signs of this girl have been described in detail elsewhere.<sup>2</sup>

The scalp hair of a German girl was normal at birth and started to grow curly and badly combable from the age of 3 months. Hair growth was claimed to be decelerated by the mother. On clinical examination at the age of 3.5 years her shoulder-length light hair appeared dry and stood out in all directions. Hair density was not reduced, and no other abnormalities could be identified (no picture available).

Another German girl presented with very fair, uncombable hair at the age of 6 years (Figure 1B). Physical examination was within normal ranges. Until the age of 15 years the structure of the hair remained unchanged.

Another German girl was examined at the age of 4 years because of uncombable hair from infancy on (Figure 1A). Short hairstyles were preferred until spontaneous improvement occurred at the age of 10-11 years, when scalp hair gradually became more flat and easier to manage. Today, at the age of 25 years, few untamable hairs are left over in the frontal area which are straightened with hair gel.

A little German girl presented with normal hair at birth; soon after birth, the regrowing hair was noticeable, and UHS syndrome was diagnosed (Figure 1C). Nowadays, at the age of 10 years, the girl has long pretty hair that is well combable. There are no other abnormalities, a sibling has normal hair. No other individual in this family has abnormal hair structure.

#### **Clinical data for the individual with the *TGM3* mutation**

The clinical signs of this young men have recently been described elsewhere.<sup>3</sup>

#### **Clinical data for the individual with the *TCHH* mutation**

The German girl with the *TCHH* mutation came to the clinics at the age of 19 years complaining that her hair grows too slowly being otherwise healthy. Since her childhood, she had brittle, curly hair, which was barely combable. These symptoms improved until her 14th year of life.

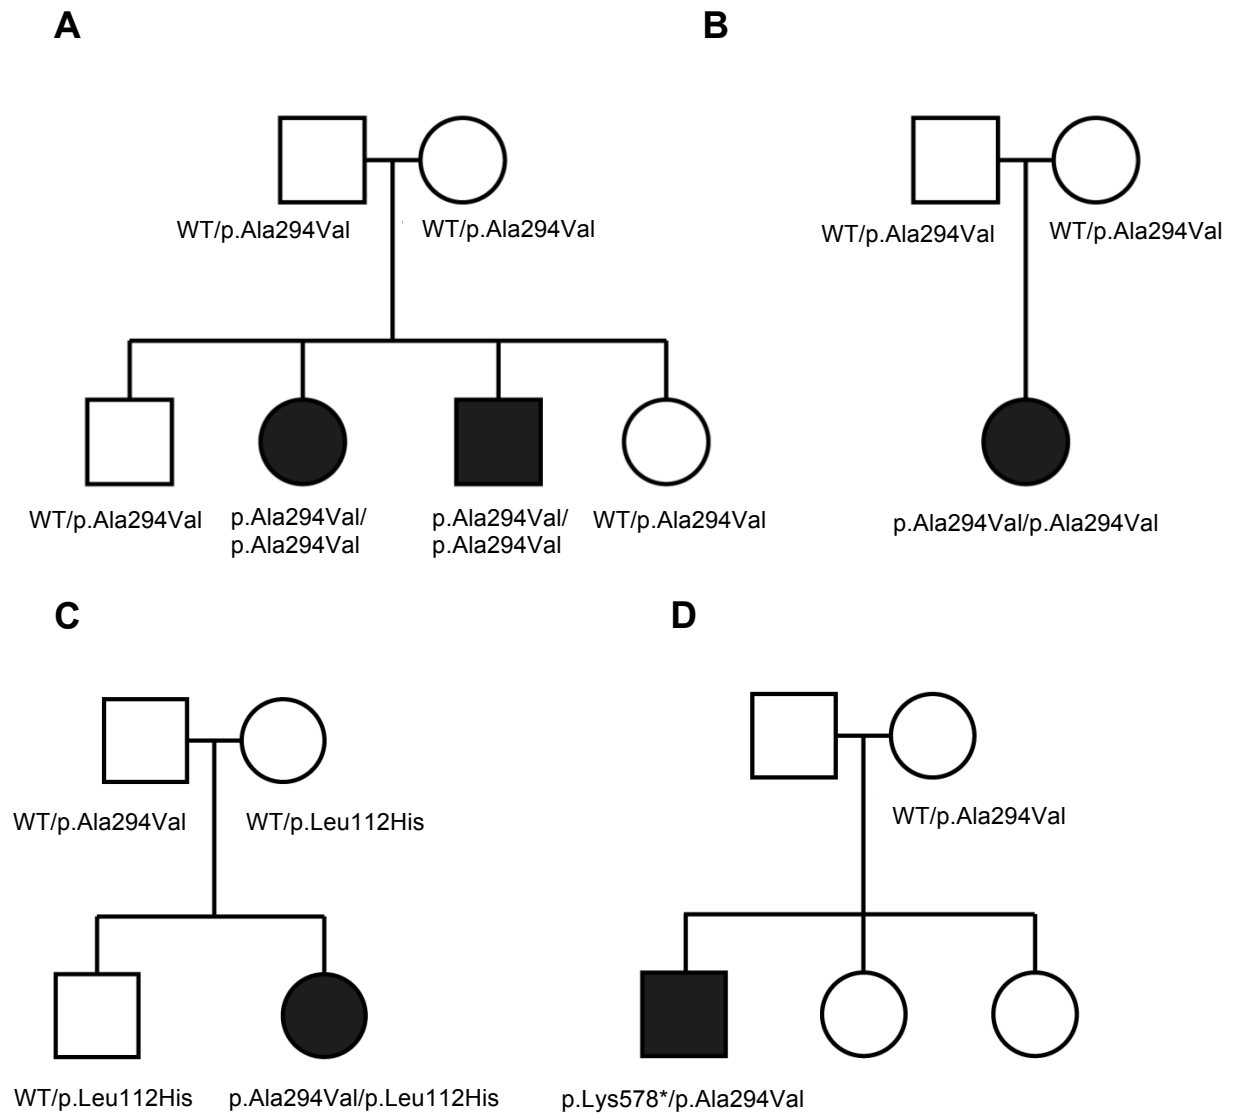

**Figure S1**

**Co-segregation of the disease-causing mutations in pedigrees**

**(A)** Discovery pedigree from the UK with two affected and two unaffected siblings. **(B)** Danish family with an affected daughter. **(C)** Spanish family showing compound heterozygosity for the mutations p.Leu112His and p.Ala294Val in the affected daughter. **(D)** Swiss family showing compound heterozygosity for the mutations p.Ala294Val and p.Lys578\* in the affected son. DNA was not available from the healthy father and siblings. WT, wild type

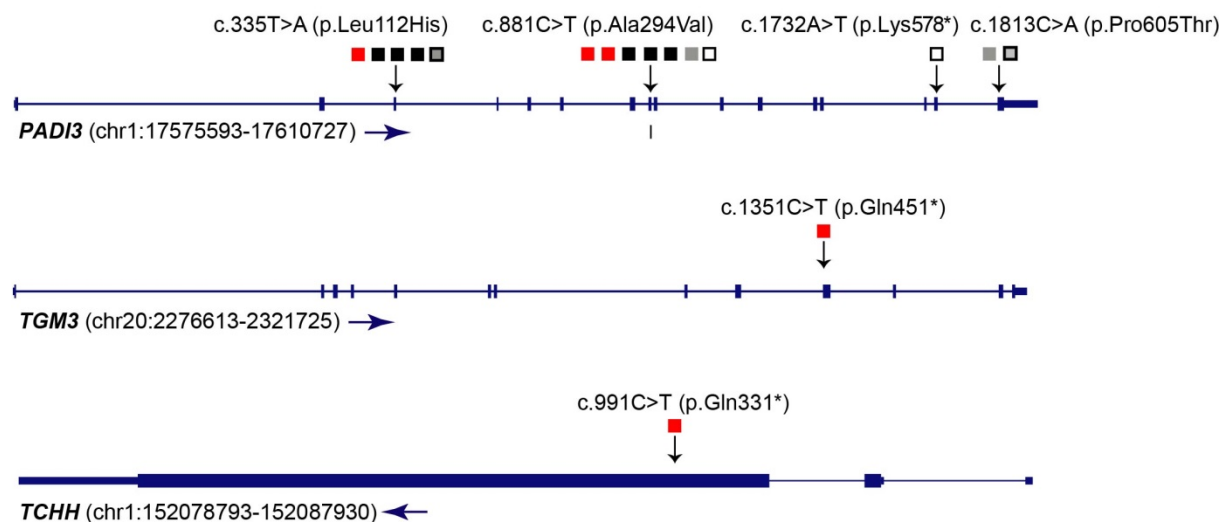

**Figure S2**

**Cartoons depicting the positions of the mutations in *PADI3*, *TGM3* and *TCHH***

The start/end positions of the genes are based on hg19. Direction of transcription is depicted with the arrow heads. Squares indicate individuals carrying the respective mutation. Red squares denote homozygotes. Black squares denote individuals carrying p.Leu112His and p.Ala294Val, grey square denotes the individual carrying p.Ala294Val and p.Pro605Thr, grey square with a black frame denotes the individual carrying p.Leu112His and p.Pro605Thr, and white square denotes the individual carrying p.Ala294Val and p.Lys578\*.

1 10 20 30 40 50 60 70 80 90 100 110

hPAD1 MAPKRVVQLSLKMPHTAVCVVGYEAHVYDIHSDVPGKANSFRVSGSSGVVEVFMVYNNRTRYKEPI-GKARWPLDTADAHVYVSGTASKELEKDFKVRYSYFGEQE

hPAD4 MAQGLTIRYTPQEPHTAVCVLGTLTQLQICSSAPEDCTFSINASPVVVDIAHSPPAKKST-GSSTPLDPGVEYTLTKHAGSGTGQDKQVSIYGYPKT

hPAD3 HSLQRTVRSLEHPTSAVVCVGYETLVDIYGSVPEGTENFEVYGPVVDIYISPNMERGERA-DTRNRWFOATLEIIVHNSPNDLNDSHVQISYHSSHE

hPAD2 MLRERTVRLQVGSRYEAVYVGLTYLWTDVYSAPAGAGTFSLKHSHEVWVEVYRGEACEVATNGKQRMLLSPSTTLRVTHSQASTASSDKYTVNYDEEG

hPAD6 MVSVEGRAMSFQSIHLSDSPVHVCVLTGTEICLDLSCGAPQKQCFTIHSGSRVLIDVANTVISEKEA-TIHWPLSDPTATYATKNTSPSPSYDADKVSVTYYPNE

Consensus .....Ms.q.i.!.lsl.spvhAVcVlGte..lD..g.aP..c#.F.i.gs..V.l!a.....eke.a..t..Mpls..t..tv..H.spS.s...dkV.!.Ygg.e

111 120 130 140 150 160 170 180 190 200 210 220

hPAD1 DQALGRSVLTGVYDISLEVDTGRGKYK-RSQGDKTWRMGPEGYGAILLYNCDRNHRSAEPDLTHSLMSLADQLDMSPLLSCNGPKDLFDSHKLVLNVFSDSK

hPAD4 PPV-KALLTFAVEISLCADITRTGKVPKTRAVKQRTTWGPGCGGAILLYNCDRNLESSAMDCEDDEVLDSQLDQMSLTLSTKTPKOFFTNTHTLVHVARSEMD

hPAD3 PLPLAYAVLTGVYDISLDCNLNCEGRQ--KNFVDRKRWVWPGSGYGGAILLYNCDRDPCDQVQNCQDHVHCLQLDQMSYHVLRTQGPAALFDDHKLVLHTSSYDAK

hPAD2 SIPIDAGLLFAIEISLDVADRDGVVE--KNPNPKASHTWGPGCGGAILLYNCDRNTEPHLPKEDCRDEKYSKEDLKHMSHLRTKGPDRLPAGYEIVLYISMSD

hPAD6 DAPVGTAVLTGVIEVSLEVDTYRNGQVEMSSDKQAKKKHWGPGSGWAILLYNCNADVVGQQLDCKTKKVIFSEETINLSQHTLVNQGSPCILKKYRLVLHTSKEESK

Consensus d.p.g.AvLlGt!#lSlWdi.r.g.ve.....Kk..W.GPsg.GaILLVNCr.d.....ed...kV..s#l.#\$SqMcl..qGP.....y.lVlhts..\$sk

221 230 240 250 260 270 280 290 300 310 320 330

hPAD1 RYRVFCARGGNSLSD-YKQVLPQCLSYEYERQPGQEIKFYVEGLTFPDADFGLVLSLSVLPDGLT--PEVTLFTDTYVGRFAPWIMTPTNQPEELYVCRYMDTH

hPAD4 KRVYFQATRGKLSK-CSVYLPKPWSHYLMVPGGKHMDFFYERALAPDPTFGLITLTLSDLTSLN-ELPERVYFQDSVYFRFAPWIMTPTNQPEVYACSFEE

hPAD3 RAQVFHICGPEDEVCEARYHVLGQDKVSYVPRLHGDEE-RFFVEGLSFPDAGFTGLISFHYTLDDSNEDFSASPTFTDTYVFRFAPWIMTPTSLPLEVYVCRYRN

hPAD2 KVGVFVYENP-FFGQRYIHLGRRLKYHYVKYTGGSALLFFVEGLCFPDGEFSGLVSTHYSLLEYMAQ-DLPLTPTFTDTYVFRFAPWIMTPTNLPPVSVFVCKMKD

hPAD6 KARVYVWPKDN--SSTFELVLGPQDQHYTLALLGNHLKETFYVEATFAPSAREFSGLSISYSVSLVEESQDPSIPETVLVKOTVYFRFAPCVFIPCTQVPLEVYLCRELQ

Consensus karV%.....n.s.%..!lGpd...y.l.lgg.....F%YealaFPda.FsGL!S.sVslV#s....ipetvl%.DTV!FRFAPWimTpt.qpPleV%.Cr..#

331 340 350 360 370 380 390 400 410 420 430 440

hPAD1 GSNEKFLEDMSYLTLCANCKLTICPQVENRDRWIQDEMEFGYIEAPHKSFYVFDSPNRNGLKDFPKYKRI LGPDFGYVTR EIPLPGPSSLSDFGNLDVSPPVYTGGETEY

hPAD4 --MEDFLKSVTTLAMKAKCKLTICPEENNDQWQDEMEIGYIAPHKTLPVVFDSPNRNGLKEFPKRYHGPDFGYVTRPGTGGTSGLSDFGNLVEVSPPVYVRGKEY

hPAD3 --NTCFVDAVIELARKAGCKLTICPQENRDRWIQDEMEIGYVQAPHKTLPVVFDSPNRNGLQDFPKYKRI LGPDFGYVTR EPRDRSVSGLSDFGNLVEVSPPVYVANGKEY

hPAD2 --NYLFLKEVKNLVEKTNCELKVCYFLNRGDRWIQDEMEIGYIEAPHKGFYVLDSPRGNLKDFFPKVLLGPDFGYVTR EPLFESVTSLSDFGNLVEVSPPVYVNGKTY

hPAD6 --LQGFVDTYTKLSEKSNQSVASVYEDPNRLGRWLQDEMAFCYQAPHKHTSLILDTQPADLDEFPHKYSLSPGIGYMIQDTEHKKVASHDSIGNLHVSPPVYVQGKEY

Consensus n..Fvd.Vt.L.eK.nc.l..c.#..NR.dRW.QDEmefgY.#APHKt.pv!lDsPr...L.#FP.K..LgPdFgyVtr#..d..!.s!\$SDFGNL.VSPPV.v.gKeY

441 450 460 470 480 490 500 510 520 530 540 550

hPAD1 PLGRILIGSS-FPKSGGRMARARYNRLKAQVQAPVELYSOHLVGHVDEFLTFTVPTSDQ--KGFRLLLASPSACPKLFQEKKEEGYGEAAQFDGLKHQA--KRS

hPAD4 PLGRILIGDSCYPNSDRQHQAQLQFLSAQVQAPVKLYSOHLVGHVDEFLTFTVPTSDQ--KGFRLLLASPSACYKLFQEQNEGHEGALLFEGIKKKK--QKQ

hPAD3 PLGRILIGGN-LPGSSGRVYTVQVDFLHAQVQAPVELFVQMLVGHVDEFLTFTVPTSDQ--KGFRLLLASPGACFKLFQEKQKCGHGRALLFQGVVDE--QVK

hPAD2 PLGRILIGSS-FPLSGGRNTRKYVDFLKAQVQAPVELYSOHLVGHVDEFLTFTVPTSDQ--KGFRLLLASPSACYKLFREKQKDGHEGIMFKGLGHS--SKR

hPAD6 PLGRVLIGSSFYPSAEGRAMSKTLRDLFLAQQVQAPVELYSOHLVGHVDEFLTFTVPTSDQ--KGFRLLLASPSACYKLFREKQKEGYDGLLFDLRLADQLLSNGRE

Consensus PLGR!LIGss.yPs..GR.n.k.lROFL.AqVQaPVELYSOHL.vGHVDEFL.FlPt.d....KgfLl\$!\$sPSAC\$KLFREKQkeGyG.l\$!\$fdgl..d.....r.

551 560 570 580 590 600 610 620 630 640 650 660

hPAD1 --INEMLADRLQRNLHAQKCIDWNRNVLKRELGLAESDIIDIPQLFLKNFY--AEAFFPNVNMVVLGKYLGIKPKPFPIINGRCCLLEEKVQSLE

hPAD4 --IKNILSNKTLREHNSFVERCIDWNRNLLKRELGLAESDIIDIPQLFLKEFSK--AEAFFPNVNMVVLGKYLGIKPKPFPIINGRCCLLEEKVCSLE

hPAD3 TISINQVLSNKDLINYNKFVQCIDWNRNVLKRELGLAESDIIDIPQLFKTER-KK--ATAFFPNVNMVVLGKYLGIKPKPFPIINGRCCLLEEKVRSLE

hPAD2 -ITIKILSNESLVQENLTFYQRCIDWNRNLLKRELGLTEQIIDLPALFKMDEDR--AEAFFPNVNMVVLGKYLGIKPKPFPIIVEECCLEHVRGLLE

hPAD6 AKTIDQLLADESLKKQNEYVEKCIHLNRDILKTELGLYEQDIIIEIPQLFLEKLTINIPSDQPKRSFARPYFPOLLRNIVIGKNLGIKPKPFPIIKGTCCLEEKICLLE

Consensus ..tIq.La#esl..N.zv#KcidwNR#!Lk.ELGL.EqDII#iPqL.le.....Ara%FP#vnmHilgK.LGIKPKPF!#.g.CCLEek!c.LLE

661 670 680 690 700#2

hPAD1 PLGLHCTFIIDYLSYHELQGEHCGTNVRRKPFKFWNMVYP

hPAD4 PLGLQCTFIIDFFTYHIRHGEVHCGTNVRRKPFKFWNMVYP

hPAD3 PLGLHCTFIIDFTYHMLHGEVHCGTNVRRKPFKFWNMVYP

hPAD2 PLGLQCTFIIDISAYHKLGEVHCGTNVRRKPFKFWNMVYP

hPAD6 PLGFKCTFIIDFCYLTEVGDCICACANIRVPFTKFWNMVYP

Consensus PLGL.LCTEi#dF..Yh..G#!hctN#!RkPFTFKWu.HVYP

## B

CLUSTAL O(1.2.1) multiple sequence alignment

```
SP|Q9ULW8|PADI3_HUMAN   MSLQRIVRVSLHPTSAVCVAGVETLVDIYGSVPEGTEMFEVYGTGPGVDIYISPNMERGR 60
SP|Q9Z184|PADI3_MOUSE   MSLQRIVRVSLHPTSAVCVAGVETLVDIYGAVPEGTDMFEVYGTGPGVDIYVSPSMERSR 60
SP|O02849|PADI3_SHEEP   MSLQRIVRVSLHPTSAVCVAGVETLVDVYGSVPEGTEMFEVYGTGPGVDVYICPSVERDR 60
TR|G3VER6|G3VER6_SARHA  MSLQRIVRVSLHPTSAVCVAGVETLVDIYGSVPEGTETFEVYGTGPGVDIYISPNMKASR 60
TR|E2R691|E2R691_CANFA  MSPQRIVRVSLHPTSAVCVAGVETLVDIYGSVPEGTEMFEVYGTGPGVDVYISPSMERGR 60
TR|F1NP39|F1NP39_CHICK  MAQQRVQLCTQRPTSTVCLGTELSDLIQGSAPKDAIAFHVQGTGPGVKVYVHVHETQSVK 60
                        *: ** *::: :***:*** *. *  *: *:.*: :  *. * *****.:*: . : :

SP|Q9ULW8|PADI3_HUMAN   ERADTRRWRFDATLEIIVVMNSPSNDLNDSHVQISYHSSHEPLPLAYAVLYLTCV---DI 117
SP|Q9Z184|PADI3_MOUSE   ERADTRRWCFNKGLEIIVIMNSPSNDLNDSHVQIAYHSSREHLPLAYAVLYLTCV---DI 117
SP|O02849|PADI3_SHEEP   ERAVARRWHFDMGSQIVVMNSPSNVNDTVTFKFPTIPAETPRPLAYAVLYLTCV---DI 117
TR|G3VER6|G3VER6_SARHA  ERADTRRWHFNRGLEIIVVMNSPSNDVNDSHVQISYHSRKEPLALAYAVLYLTCVETDI 120
TR|E2R691|E2R691_CANFA  ERADTRRWHFNDGLEIIVVMNSPSNDLNDSHVQISYHSSHEPLPLAYAVLYLTCV---DI 117
TR|F1NP39|F1NP39_CHICK  LPSSVTRWPLATGTETVLLTMAISKVDGDEKVRISYFGEASGVPVGRAMLYLTCV---DI 117
                        : . ** :      ::*: *:      .::      .: ***** **

SP|Q9ULW8|PADI3_HUMAN   SLDCDLNCEGRQDRNFVDKRQWVWGPGSGYGILLVNCDDPSCD-----VQDN 166
SP|Q9Z184|PADI3_MOUSE   TLDCDMNCADRQDRSFVDKRQWVWGPDGYGAILLVNCDDRDNDVSN-----AQDN 166
SP|O02849|PADI3_SHEEP   TLDCDLNCEGRQDRDFVDKQWVWGPGSGHGAVLLVNCDDRDSMSN-----DQEH 166
TR|G3VER6|G3VER6_SARHA  SLDTDMNCNGKVERNVDKRQWVWGPGGGHGAVLLVNCDDRDLTCD-----KRDN 169
TR|E2R691|E2R691_CANFA  ALDCDLNCEGRQDRSYVDKRQWVWGPGGYGAVLLVNCDDRDVTCY-----DQDN 166
TR|F1NP39|F1NP39_CHICK  SLDADTRGRNSVSKTLVDKATWTFWGPDPGHGAILLVNCDDCDPKSRLMGDSSEFPQSQLTDN 177
                        :** *      .:  *** *.*** *:.*:***** *. .      :.

SP|Q9ULW8|PADI3_HUMAN   CDQHVVHCLQDLEDMSVMVLRTQGPAALFDDHKLVLHTSSYDAKRAQVFHICGPEDVCEAY 226
SP|Q9Z184|PADI3_MOUSE   CDQYVRCLQDLEDMSVMVLRTQGPEALFEDHRLILHTSSCDAERARVHVCGPEDSCESY 226
SP|O02849|PADI3_SHEEP   CDHHVRCLQDLEDMSVMILRTQGPDALFDDHKLVLHTSRADAERARVFHACGPEDSCESY 226
TR|G3VER6|G3VER6_SARHA  CDKVCRCLEDLQDMSLMILRTQGPTALFDDHKLVLHVSSFDAERARVFHACGPEDVCEAY 229
TR|E2R691|E2R691_CANFA  CDRHVNCLQDLEDMSVMVLRTQGPAALFDDHKLILHTSSYDAKWARVFHACGPEDSCESY 226
TR|F1NP39|F1NP39_CHICK  RDTVVCSYEDLKDMSQMVLRTGRPTIFTGHGLVLHVNFSDADKVGVFYG-GNSIALEEY 236
                        * * . :*:*** *::*:*** *: *  *:***. * . . ** : * *

SP|Q9ULW8|PADI3_HUMAN   RHVLGQDKVSYEVP-RLHGDEERFFVEGLSFDPDAGFTGLISFHVTLTLLDSDNEDFSASPIF 285
SP|Q9Z184|PADI3_MOUSE   CVLGPDMSYEV-RLKGYEERFFVEGLSFDPDAGFPGLISFHVTLTLLDSDNEDFSETPIF 285
SP|O02849|PADI3_SHEEP   RHVLGQNKVSYEVP-RFHGEEERFFVEGLSFDPDAGFSGLVTFHVTLTLLDSDNEDFSESPIF 285
TR|G3VER6|G3VER6_SARHA  RYALGPNKVSYYVP-RSNGEERLYVEGLSFDPDAGFSGLVTFHVTLTLLDSDNQDFPESPIF 288
TR|E2R691|E2R691_CANFA  RHVLGQNKVSYEVP-RFHGDEERFFVEGLSFDPDARFTGLVSFHVTLTLLDSDNEDFSESPIF 285
TR|F1NP39|F1NP39_CHICK  KHVLGGEKLAYAVKPSQHQESIFYVEGLAFPDVSFSGLVAFHVTLLESPEKGLLETPIF 296
                        : .** :*: * *      .:  ***:***. * *::*:*****.: : : :***

SP|Q9ULW8|PADI3_HUMAN   TDTVVFVRVAPWIMTPSTLPPLEVYVCRVRNNTCFVDAVAELARKAGCKLTICPQAE NRND 345
SP|Q9Z184|PADI3_MOUSE   TDTAVFRVAPWIMTPSTLPPLEVYVCRVRNNTCFVEAVEELARKAGCKLTICPQAE NRND 345
SP|O02849|PADI3_SHEEP   TDTVVFVRVAPWIMTPSTQPPLEVYVCRVRNNTCFVDAVAELARRAGCKLTVC PQAE NRND 345
TR|G3VER6|G3VER6_SARHA  TDTVIFRVAPWIMTPSTLPPVEVYVCKVRNNTHFVEAVAELARKADCKLTICPQAE NRND 348
TR|E2R691|E2R691_CANFA  TDTVVFVRVAPWIMTPSTLPPLEVYVCRVRNNTCFVDAVAELARKAGCKLTVC PQKAE NRND 345
TR|F1NP39|F1NP39_CHICK  TDTVVFVRMAPWIMTPNTLAPLEVFCVSKDNEDFVAAVSALAEAKPVTICPLPEN NRND 356
                        ***.:*:*****.* *.***:* *: *  * * * * * * . . * :*:** *****

SP|Q9ULW8|PADI3_HUMAN   RWIQDEMELGYVQAPHKTLPVVFDSPRNGELQDFPYKRILGPDFGYVTREPRDRSVSGLD 405
SP|Q9Z184|PADI3_MOUSE   RWIQDEMELGYVQAPHKTLPVVFDSPRNGELQGFYKRI LGDFGYVTREPKDSSVSGLD 405
SP|O02849|PADI3_SHEEP   RWIQDEMELGYI QAPHKTFPVVFDSPRNGELQNFPYKRILGPDFGYATREPRD NSVSGLD 405
TR|G3VER6|G3VER6_SARHA  RWIQDEMELGYI QAPHKTFPVVFDSPRNGELQDFPYKRILGPDFGYVTREPRNKS VSGLD 408
TR|E2R691|E2R691_CANFA  RWIQDEMELGYVQAPHKTFPVVFDSPRNGELQDFPYKRILGPDFGYVTREPRQDSSVSGLD 405
TR|F1NP39|F1NP39_CHICK  RWIQDEVEFGYVQAPHKMFPVVLDSPRDRGLKDFPVRSILGPDFGYVAQETPE-NTSSL 415
                        *****.:*:***** :***:***: * : * : * * * * .: * : . .*.**

SP|Q9ULW8|PADI3_HUMAN   SFGNLEVSPPVVANGKEYPLGRILIGGNLPGSSGRRVTVQVVRDFLHAQKVQPPVELFVDW 465
SP|Q9Z184|PADI3_MOUSE   SFGNLEVSPPVVANGKEYPLGRILIGGNLPGSRGRRVTVQVVRNFLHAQKVQPLVELFVDW 465
SP|O02849|PADI3_SHEEP   SFGNLEVSPPVVANGKEYPLGRILFGGNLPGSRGRRVTVQVVRDFLHAQKVQPPVELFVDW 465
TR|G3VER6|G3VER6_SARHA  SFGNLEVSPPVVANGKEYPLGRILIGGNLPGSSGRRVTVQVVRDFLYAQKVQPPVELFVDW 468
TR|E2R691|E2R691_CANFA  SFGNLEVSPPVVADGKEYPLGRILIGGNLPGSSGRRVTVQVVRDFLYAQRVQPPVELFVDW 465
TR|F1NP39|F1NP39_CHICK  SFGNLEVSPPVTVRSKEYPLGRILIGSSFPRFGRRMAKAVRNFLAAQRVQAPVELFSDW 475
                        *****.* . .*****.:. : *  * * : .: * * * * * * * * * *

SP|Q9ULW8|PADI3_HUMAN   LAVGHVDEFLSFVPAPDGGKFRMLLASPGACFKLFQEKQKCGHG RALLFQGVVDDEQVKT 525
SP|Q9Z184|PADI3_MOUSE   LAVGHVDEFLSFVPAPDGGKFRLLLASPGACFRLFQEKQKWGHGRSLLFEGVIGDRRVQT 525
SP|O02849|PADI3_SHEEP   LAVGHVDECLSFVPATDGGKFRMPLASPSACFKLFQEKQKWGHGGALLFQGVIGNQVNT 525
TR|G3VER6|G3VER6_SARHA  LAVGHVDEFLSFVPVPDDKGRFLLLASPGACFKLFQEKQKWGHGQALLFEGVVGSNQVKT 528
TR|E2R691|E2R691_CANFA  LAVGHVDEFLSFVPAPDGGKFRMLLASPSACFKLFQEKQKWGHGRALLFKGVVGD KFPVHT 525
TR|F1NP39|F1NP39_CHICK  LQVGHVDEFLSFIPAPDRKGFRLLLASPSACYQLLREKQEMGYGEATMFQGLHGV---PK 532
                        * ***** **: * . * * * : *****.:*:***: * * : :*: * .
```

```

SP|Q9ULW8|PADI3_HUMAN   ISINQVLSNKDLINYNKFVQSCIDWNREVLKRELGLAECDIIDIPQLFKTER-KKATAFF 584
SP|Q9Z184|PADI3_MOUSE   VSINQILNNQSLINFNKFQSCIDWNREVLKRELGLAEGDIIDIPQLFKTEK-RKAVAFF 584
SP|O02849|PADI3_SHEEP   VSISQVLSNGSLIGYNKFVQSCIDWNREVLKRELGLAERDIDIPQLFKMER-RKAVAFF 584
TR|G3VER6|G3VER6_SARHA  MSINQILSNENLISYNKFVQSCIDWNREVLKRELGLTDRDIIDIPQLFKRER-RKAVAFF 587
TR|E2R691|E2R691_CANFA  VSINQVLSNVDLISYNKFVQSCIDWNREVLKRELGLTERDIDIPQLFKTER-KKAVAFF 584
TR|F1NP39|F1NP39_CHICK  PSISEILGNEALRKFNAYAQSCISWNRDILKRELGLAEQDIIDIPQLFQADHQARAVAYF 592
                        **.::* * * :* :.***.***:*****.: **:* ***: :. :*.*:
SP|Q9ULW8|PADI3_HUMAN   PDLVNMLVLGKHLGIPKPFGIINGCCCLEEKVRSLEPLGLHCTFIDDFTPYHMLHGEV 644
SP|Q9Z184|PADI3_MOUSE   PDLVNMLVLGKHLGIPKPFGIINGRCCCLEEKVRSLEPLGLHCTFIDDFTPYHMLHGEV 644
SP|O02849|PADI3_SHEEP   PDLVNMLVLGKHLGIPKPFGIVINGRCCCLEEKVRSLEPLGLRCTFIDDFTPYHMLHGEV 644
TR|G3VER6|G3VER6_SARHA  PDLVNMLVLGRHLGIPKPFGIINGRCCCLEEKVRSLEPLGLQCNFIDDFTPYHMLHGEV 647
TR|E2R691|E2R691_CANFA  PDLVNMLVLGKHLGIPKPFGIINGQCCCLEEKVRSLEPLGLHCTFIDDFTPYHMLHGEV 644
TR|F1NP39|F1NP39_CHICK  PDMVNMLVLGRHLGIPKPFGILVDGQCCLEERVALLQPLGLSCTFINDYFSYHKLAGEV 652
                        **:*****:*****.:*: *****:***:*** **:* ***: ** * **
SP|Q9ULW8|PADI3_HUMAN   HCGTNVCRKPFSFKWWMNMP 664
SP|Q9Z184|PADI3_MOUSE   HCGTNVRRPFAFKWWMNMP 664
SP|O02849|PADI3_SHEEP   HCGTNVRRQPFSFKWWMCEP 664
TR|G3VER6|G3VER6_SARHA  HCGTNVRRKPFSFKWWMNMP 667
TR|E2R691|E2R691_CANFA  HCGTNVRRQPFSFKWWMNMP 664
TR|F1NP39|F1NP39_CHICK  HCGTNVRRKPFSFKWWMNMP 672
                        ***** *:** ***** * *

```

**Figure S3**

### Sequence alignments for PADI3

When we assessed evolutionary conservation of the three substituted amino acids, we found that all of them were located **(A)** at well-conserved positions across various human PADI3s and **(B)** across PADI3 from distinct species, thus suggesting that these mutations may alter the protein function. **(A)** The sequences of human PADI3 and paralogous genes (GenBank accession numbers AB033768, AB03176, AB026831, AB017919 and AY422079) were aligned using MultAlin.<sup>4</sup> Amino acids conserved at 90% and 50% are indicated in red and blue, respectively. The three mutated amino acids of PADI3 are surrounded. **(B)** Primary sequences of human PADI3 and Padi3 from other species (chicken, mouse, sheep, dog (CANFA) and Tasmanian devil (SAHRA) were aligned using Clustal Omega (European Molecular Biology Laboratory-European Bioinformatics Institute). The three mutated amino acids of PADI3 are depicted in red.

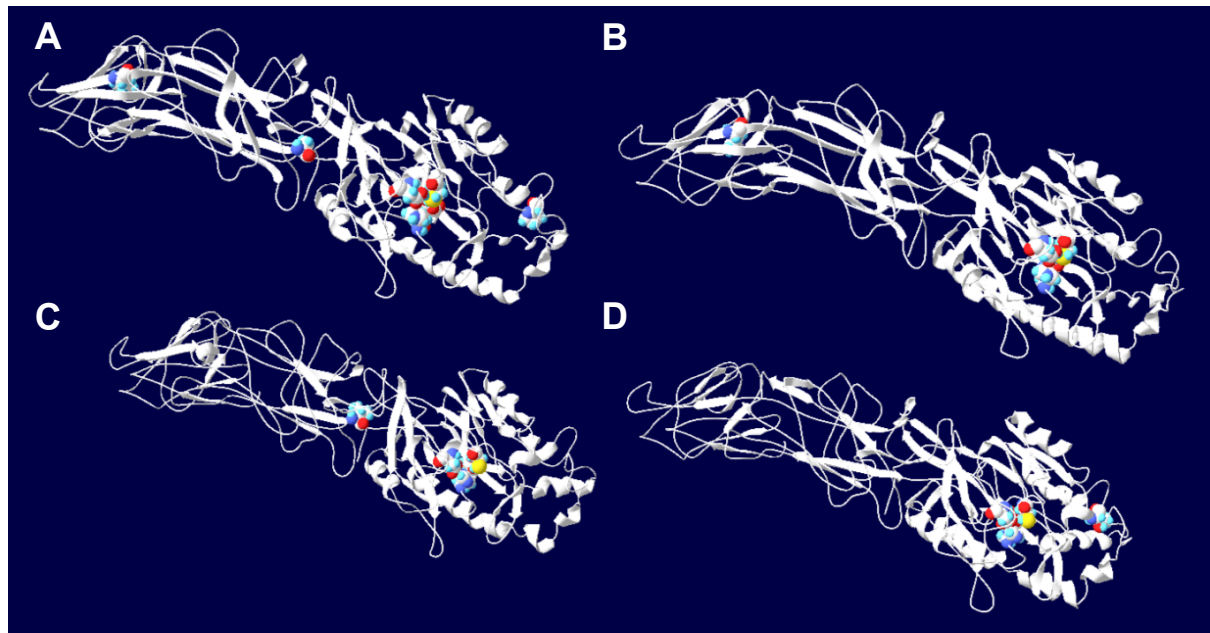

**Figure S4**

**Topological tridimensional models of WT and mutant PADI3: Localization of the 4 major amino acids involved in the catalytic sites and of the 3 amino acids involved in the UHS missense mutations**

Overall view of the tridimensional solid ribbon representation of calcium-bound PADI3 models, including WT and three missense mutants. Residues Leu112, Ala294 and Pro605 are reported on the model of the **(A)** WT enzyme, as well as the corresponding substituted amino acids on the structure of the three mutants **(B)** p.Leu112His, **(C)** p.Ala294Val and **(D)** p.Pro605Thr. **(A-D)** The four major amino acids involved in the catalytic site are also shown. According to these models, the **(C)** p.Ala294Val and **(D)** p.Pro605Thr substitutions induce a profound disorganization of the immunoglobulin-likes domains, with clear disappearance of several beta-sheets, and disruption of some alpha-helices in the catalytic domain, as compared to the WT. Effects of the **(B)** p.Leu112His substitution are more discrete.

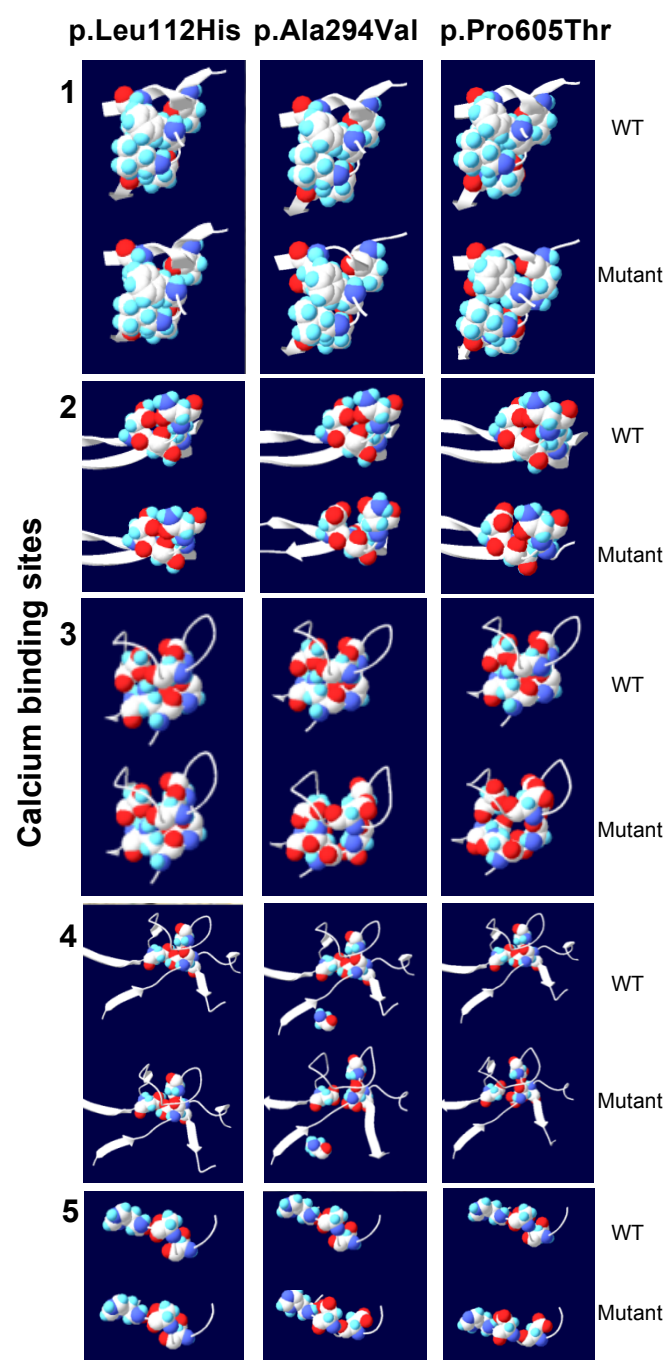

**Figure S5**

**Topological tridimensional models of WT and mutant PADI3: Predicted calcium binding sites**

Zoom on the amino acids involved in the five calcium-binding sites (1-5). As previously published,<sup>5</sup> these amino acids (Table S2) were defined by analogy, after a multiple alignment, to the residues of the five calcium binding sites of PADI4 [MIM 605347].<sup>6</sup> None of the substituted amino acids are directly involved in calcium binding. Nevertheless, the predicted models of p.Ala294Val and p.Pro605Thr mutants show clear spatial modifications of, at least, the calcium-binding sites 2-5.

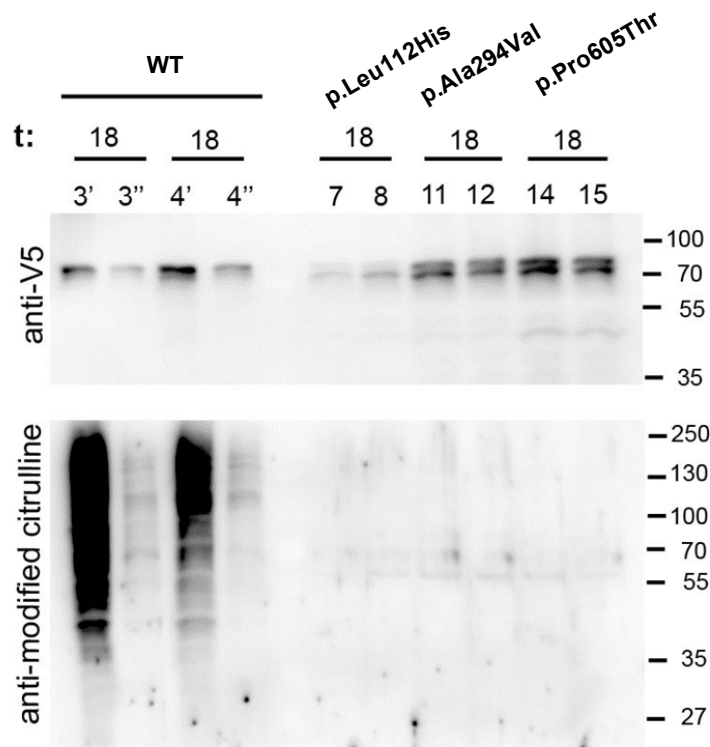

**Figure S6**

**Absence of activity of mutant PADI3 produced in bacteria**

Extracts of *E. coli* producing WT PADI3 were diluted either four (3' and 4') or eight times (3'' and 4'') in order to adjust the amounts of PADI3, as compared to undiluted extracts containing the mutant enzymes, p.Leu112His (clones 7 and 8), p.Ala294Val (clones 11 and 12) and p.Pro605Thr (clones 14 and 15). The extracts were then incubated for 18 hours with calcium, as indicated. After incubations, proteins were immunodetected with either the anti-V5 antibody or anti-modified citrulline antibodies. While citrullinated proteins were detected in the WT-containing extracts, no citrullinated proteins were detected in the mutant-containing extracts. Molecular mass markers are indicated on the right in kDa.

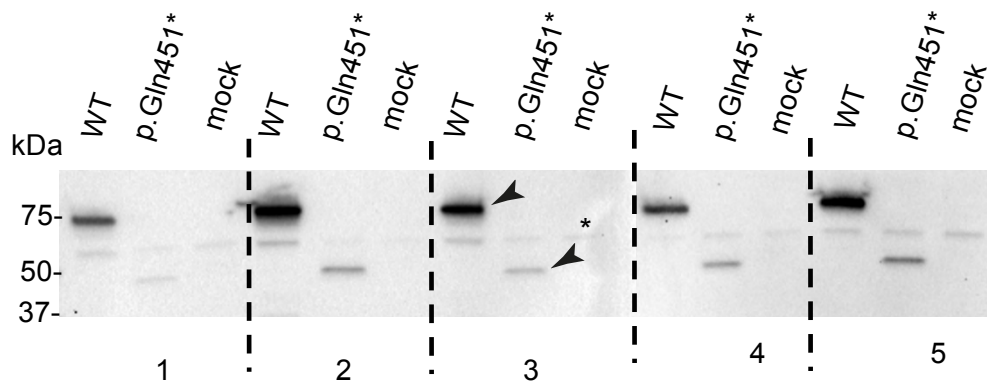

**Figure S7**

**Immunoblotting of HEK293T extracts producing WT and mutant TGM3**

Immunoblotting analysis shows the detection of WT and truncated TGM3 in transiently transfected HEK293T cells, which were collected 48 h post-transfection. Cell extracts from independent transfections (1-5), were concurrently immunoblotted (1-3, 4-5) with an anti-Flag antibody. Antibody-specific bands showing the WT (~70 kDa) and truncated TGM3 (~40 kDa) are indicated with an arrow and a non-specific cross-reactive band around 55 kDa is indicated with an asterisk. A persistent lower detection level was observed for the mutated protein in comparison to the WT TGM3. Relative protein quantification was performed using Stain-Free technology that is based on normalization by the total lane protein content (Bio-Rad Laboratories).

WT

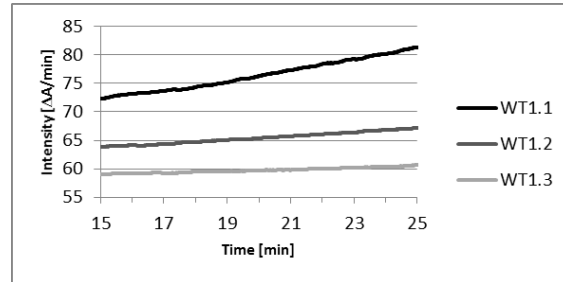

Mut

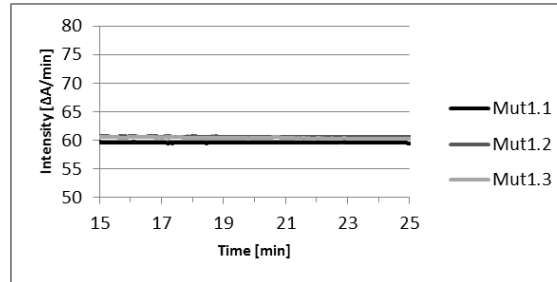

Ctrl

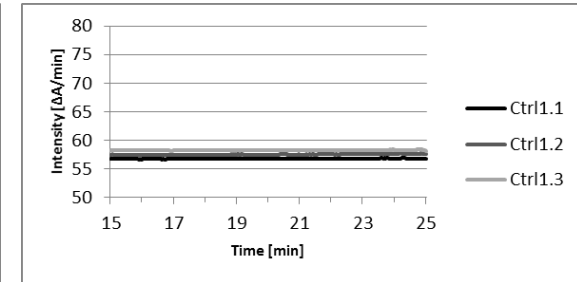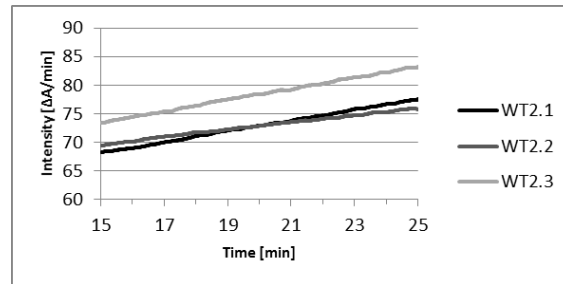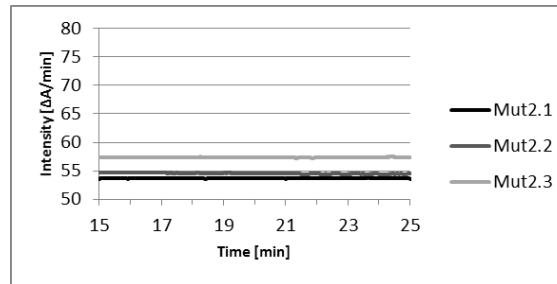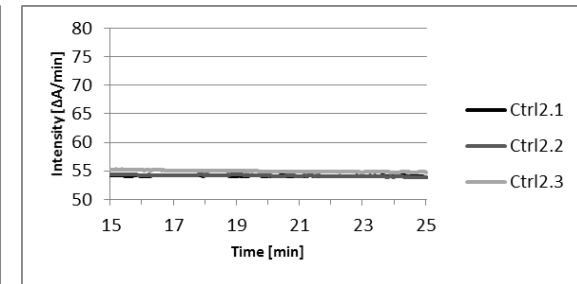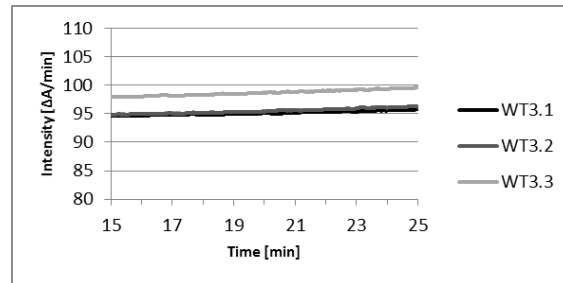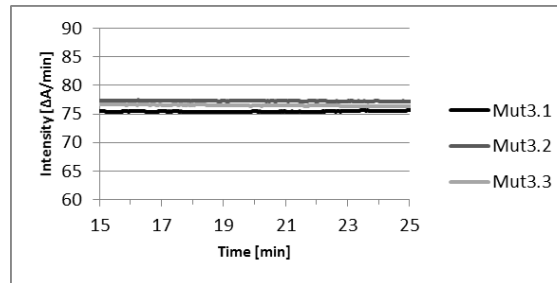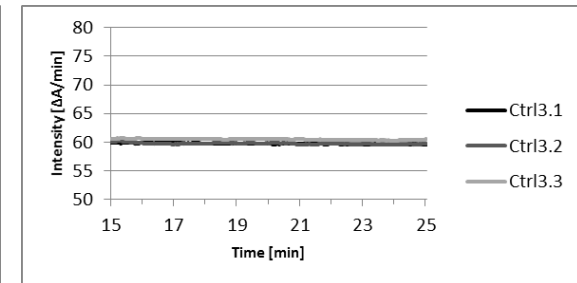

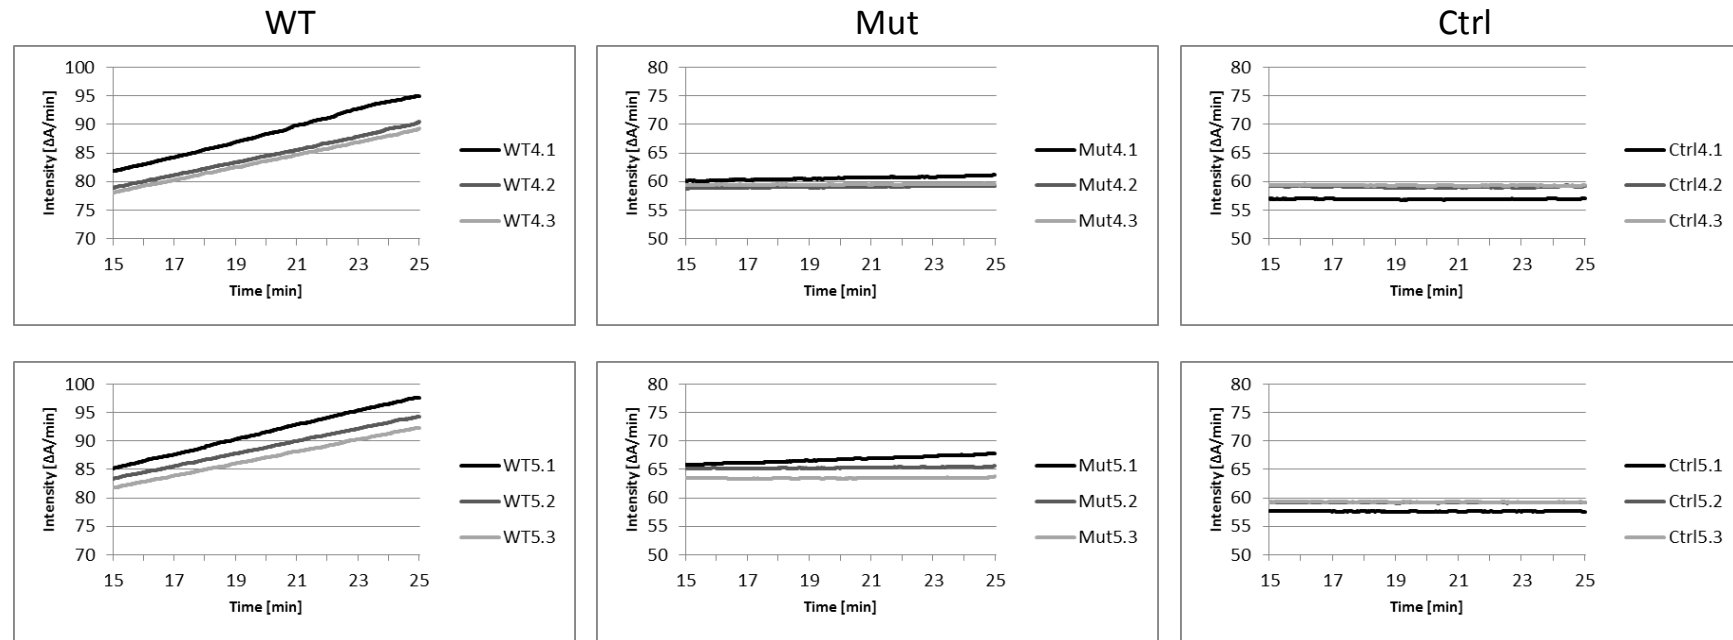

**Figure S8**

### Transglutaminase activity of TGM3 produced in HEK293T cells

Fluorescence intensity augmentation by incorporation of monodansylcadaverine into casein. Measurements from five independent transfections are presented in rows. Three technical replicates for each sample are depicted with color-coded lines. Linear slopes of the measurements represent the transglutaminase activity.

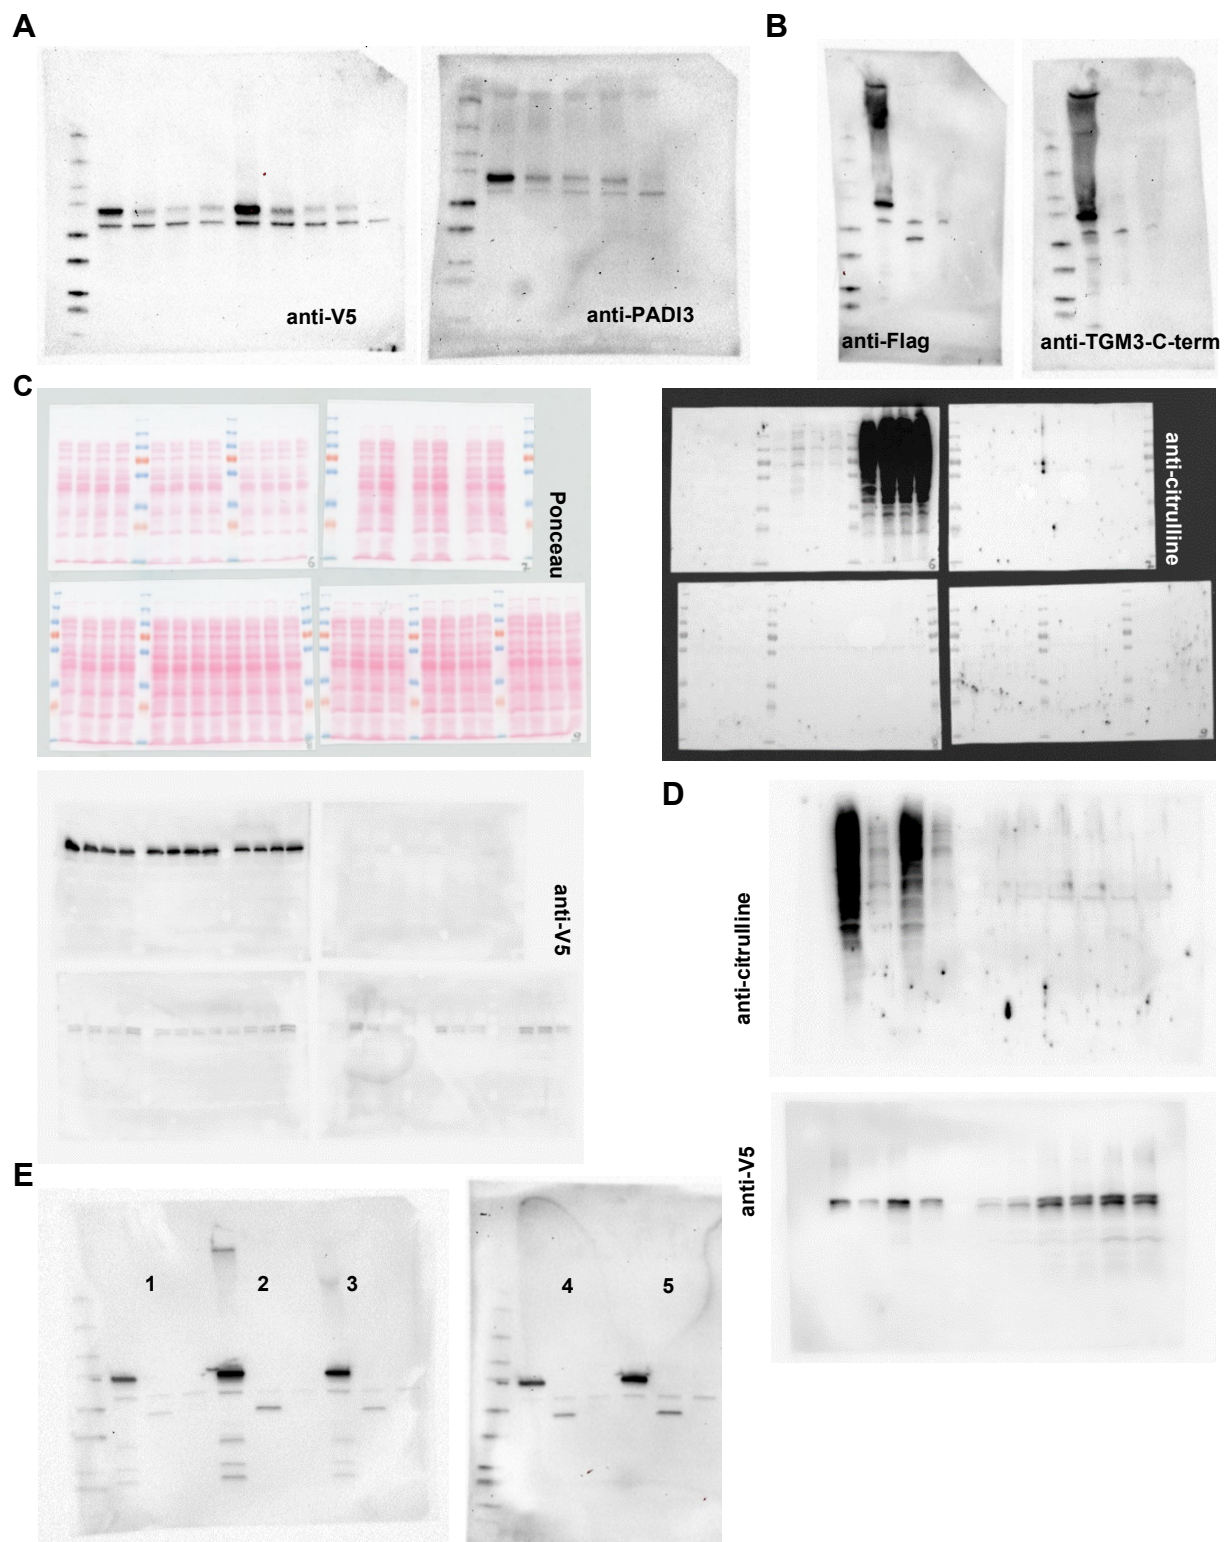

**Figure S9**

**Full-length gel and blot images from the main figures.**

Full-length images of the blots/gels in **(A)** Figure 4A, **(B)** Figure 7A, **(C)** Figure 5B, **(D)** Figure S6 and **(E)** Figure S7

## Supplemental Tables

**Table S1. Primers used for sequencing of *PADI3***

| Amplicon        | Forward (5'-3')                                       | Reverse (5'-3')                                      |
|-----------------|-------------------------------------------------------|------------------------------------------------------|
| PADI3_ Ex1      | CTGAGCTCTCAGCTCTGGGA                                  | TCTTCTACCTGGCTCAGCC                                  |
| PADI3_ Ex 2     | GCTTGACTCGCAGGAGCTTA                                  | TCTGTAACCTGCAGAGCTGG                                 |
| PADI3_ Ex 3     | GGCACAGAGGAGGTAAAGAA                                  | TCCATTTGTGGAGGCTTAGC                                 |
| PADI3_ Ex 4     | CCTCTTGATGGTGTCTCCTT                                  | AGTCCAGAAGGTCTTGATCCC                                |
| PADI3_ Ex 5     | GCCATTGACATGTCTTGAGAA                                 | AGCATCGAGGTGTGTCTGG                                  |
| PADI3_ Ex 6     | CAGCTGGCTATGCCACACT                                   | TTCTGACTGTTCTTACTGCG                                 |
| PADI3_ Ex 7     | CCACTGTGTATTACCTGTCCT                                 | TGATCATGGCTCACTGCAAC<br><i>TAGGTGTACACCACTATACC*</i> |
| PADI3_ Ex 8/9   | GGTTCATTTCCATCTTGCAGA                                 | TGTTGAATCCAGGATCAGC                                  |
| PADI3_ Ex 10    | CTGACCTGGGCACATTTATG                                  | TTTAGGGCTGCCAGATTCAG                                 |
| PADI3_ Ex 11    | CTCAGGCTCCATGTCCGAT                                   | AATGATCTCTTAGGTCTCTGC                                |
| PADI3_ Ex 12/13 | AGATTTTCCTGGATGGTGGG<br><i>GCAGGAATGCTAAACTCTTGT*</i> | AGTCCATGTCCACCTTCTATC                                |
| PADI3_ Ex 14/15 | GGCTGCTGACTCGGCAAGA                                   | TCCCAGCTGATGCCATGTGC                                 |
| PADI3_ Ex 16    | CCAGAGTGAGTTCTGCGGAT                                  | AAGTCTGAGAACCACATGGG                                 |

Primer pairs are used both for amplicon generation and Sanger sequencing reactions. \*Additional primers were used for the cycle sequencing reaction in order to cover the whole region.

**Table S2. Primers used for sequencing of *TGM3***

| <b>Amplicon</b> | <b>Forward (5'-3')</b> | <b>Reverse (5'-3')</b>                           |
|-----------------|------------------------|--------------------------------------------------|
| TGM3_Ex 1       | AGGCAATCCTTGGCAGCCTG   | GATGTCCAGCTGCACTGAACA<br>AAGGCAGGCAGCTGTCTCTGG*  |
| TGM3_Ex 2       | AGGATGCACAGAGGTTTCAGC  | AGAGATGGACAGCAACTTGC                             |
| TGM3_Ex 3       | GTTGTATTGGAACCTGGTCT   | TGCTTAAGTGTCTCAGAGCTCC<br>TAGGCCAGGGCTGAGAGTGTG* |
| TGM3_Ex 4       | AAGCAGCTGTCTGAGTGTGG   | ACACTAAGGAAGTGTTCATCGC                           |
| TGM3_Ex 5       | TCAGTAGCTCTCAGTTCCAG   | TACTCACTGTGTGCCTCAGG                             |
| TGM3_Ex 6/7     | ACTGTGACAGCAGTGATAGCC  | AGACTAGCAGACCGCAGAGC<br>GTGAGAGCGAGAAGCCACTCA*   |
| TGM3_Ex 8       | ACTCACTCGATGCATGTTGTC  | AGGCTCTGTGCAGCAACAGTG                            |
| TGM3_Ex 9       | TTGCAGTGGTCCTGGAAGGC   | AGGCAGAACTGGCTGCCAGTG                            |
| TGM3_Ex 10      | TCCGGTTAAGACAGGCGAGC   | TGTGCCATAGCTATGAACTGC                            |
| TGM3_Ex 11      | TGGCCCAAGGAGGGCTCAGTC  | TGGGAGAGCTGTGGCTCACAG                            |
| TGM3_Ex 12      | AGCACAGGATAATGTCCTGG   | AGATTCTAGAGTTCCAAGACC                            |
| TGM3_Ex 13      | AACAGGACAGGAGGTCACAG   | TCCATGGTGAGCTCTCCCTG                             |

Primer pairs are used both for amplicon generation and Sanger sequencing reactions. \*Additional primers were used for the cycle sequencing reaction in order to cover the whole region.

**Table S3. Primers used for sequencing of *TCHH***

| Primer Name        | Sequence (5'-3')                  |
|--------------------|-----------------------------------|
| <b>TCHH_EX 2F</b>  | <b>GGTGGAGAGCTGGAAGAAAGACA</b>    |
| <b>TCHH_EX 2R</b>  | <b>TGGGGGATGTAGTGTAGACCTGTT</b>   |
| <b>TCHH_EX 3F</b>  | <b>TGAGCTCTTCATGGGACATTACCACA</b> |
| <b>TCHH_EX 3R</b>  | <b>TGCACTTTCCACAAGATGGGTCA</b>    |
| <i>TCHH_SF1</i>    | <i>GCTCTGAATGTCTCTTGAATGTCA</i>   |
| <i>TCHH_SF2</i>    | <i>CAAAGGCAAGAATGGCAAGAA</i>      |
| <i>TCHH_SF5</i>    | <i>CTAGCTGAGGAGGAGCAGGAACA</i>    |
| <i>TCHH_SF6</i>    | <i>GTGGCAACTAGAAGAAGAAAGGA</i>    |
| <i>TCHH_SF8</i>    | <i>CAAAGGCAGAGAGAATGAACAGTT</i>   |
| <i>TCHH_SF16</i>   | <i>CAGCAGCGGGAACAACGGTTTCT</i>    |
| <i>TCHH_SF20</i>   | <i>CGAACAGGAACTGCGCAGTCAGGA</i>   |
| <i>TCHH_SF23</i>   | <i>GAGCAGCTGCTGAGAGAGGAACA</i>    |
| <i>TCHH_SEQ1F</i>  | <i>TGGAGCGGCAAGAGCTGAG</i>        |
| <i>TCHH_SEQ3F</i>  | <i>TCGGAAGGATAAGAAGCTG</i>        |
| <i>TCHH_SEQ5F</i>  | <i>AGAGTCGTCGTGAGGAACAAG</i>      |
| <i>TCHH_EX3.2F</i> | <i>CGCAGGCAGAAGAGGCAGGAA</i>      |
| <i>TCHH_EX3.3F</i> | <i>GCGGTTGAGGAGCGAGCAAC</i>       |
| <i>TCHH_EX3.4F</i> | <i>CCAGCAGCGGGAACAACGGT</i>       |
| <i>TCHH_EX3.5F</i> | <i>GCGGGAGAGGCAGTATCGGG</i>       |
| <i>TCHH_EX3.6F</i> | <i>CAGCGCGACAGGCATTTC</i>         |
| <i>TCHH_EX3.7F</i> | <i>CAACAGCTGCGTCACGACCG</i>       |
| <i>TCHH_EX3.1R</i> | <i>CTGTCTTGCCGCTCTCGCCT</i>       |
| <i>TCHH_EX3.3R</i> | <i>CTTGGCGTACAGCGTGTGGC</i>       |
| <i>TCHH_EX3.4R</i> | <i>TGTCGCGCAGCTGGGAATCT</i>       |
| <i>TCHH_SR2</i>    | <i>TCCTTTCTTCTTCTAGTTGCCAC</i>    |
| <i>TCHH_SR3</i>    | <i>CAGCTTCTTATCCTTCCGA</i>        |
| <i>TCHH_SR4</i>    | <i>AACTGTTCAATTCTCTCTGCCTTTG</i>  |
| <i>TCHH_SR5</i>    | <i>CTTGTTCTCCTCACGACGACTCT</i>    |
| <i>TCHH_SR9</i>    | <i>GACGGAGCTGCTCTTCTCTAGGAT</i>   |
| <i>TCHH_SR10</i>   | <i>CCAGCGATACTTTCCGTACGCTGTT</i>  |
| <i>TCHH_SR11</i>   | <i>GAGGAAGAACAGCTGGAGCGAGA</i>    |

Primer pairs used for amplicon generation are given in bold and primers used for cycle sequencing reactions are given in italic. Presence of *TCHH* mutations in the coding sequence in screened individuals could not be entirely excluded as overlapping and/or individual regions could not be sequenced in different individuals due to technical limitations arising from the repetitive regions.

**Table S4. Primers used for cloning and mutagenesis**

| Construct            | Primers                                                                                                                                       |
|----------------------|-----------------------------------------------------------------------------------------------------------------------------------------------|
| PADI3 WT             | PADI3-WT-F: 5' accATGTCGCTGCAGAGAATCGTG 3'<br>PADI3-WT-R: 5' GGGCACCATGTTCCACCAC 3'                                                           |
| PADI3<br>p.Leu112His | PADI3-Mut-p.L112H-F: 5' CCTATGCGGTGCTCTACCA <b>C</b> ACCTGTGTTGACATCTC 3'<br>PADI3-Mut-p.L112H-R: 5' GAGATGTCAACACAGGTGTGGTAGAGCACCGCATAGG 3' |
| PADI3<br>p.Ala294Val | PADI3-Mut-p.A294V-F: 5' GTGGTGTTCGAGTGGTACCCTGGATCATGACG 3'<br>PADI3-Mut-p.A294V-R: 5' CGTCATGATCCAGGGT <b>A</b> CCACTCGGAACACCAC 3'          |
| PADI3<br>p.Pro605Thr | PADI3-Mut-p.P605T-F: 5' CCCCAAGCCCTTTGGG <b>A</b> CCATCATCAATGGCTG 3'<br>PADI3-Mut-p.P605T-R: 5' CAGCCATTGATGATGGTCCCAAAGGGCTTGGGG 3'         |
| TGM3 WT              | TGM3-WT-F: 5' accatg <i>gattacaaggatgacgacgataagccaggacca</i> ATGGCTGCTCTAGGAGTCC 3"<br>TGM3-WT-R: 5' TCATTCGGCTACATCGATG 3'                  |
| TGM3<br>p.Gln451*    | TGM3-Mut-p.Q451*-F: 5' GCTCTGACCAGGAAAGATAAGTGTTCCAAAAGGCT 3'<br>TGM3-Mut-p.Q451*-R: 5' AGCCTTTTGGAACACTT <b>A</b> TCTTTCTGGTCAGAGC 3'        |

The N-terminal flag tag sequence fused to *TGM3* is given in italic. The locations of the mutations are given in bold in the respective mutagenesis primers. WT; wild type; Mut, mutant; F; forward; R; reverse

**Table S5. *PADI3*, *TGM3* and *TCHH* mutations in ExAC database**

| <b>Variant<sup>a</sup></b>         | <b>Gene</b>   | <b>Consequence</b> | <b>Allele count</b> | <b>Total allele</b> | <b>Homozygous individuals</b> | <b>Allele frequency</b> |
|------------------------------------|---------------|--------------------|---------------------|---------------------|-------------------------------|-------------------------|
| 1:17588689 T / A<br>(rs142129409)  | <i>PADI3</i>  | p.Leu112His        | 459                 | 111360              | 0                             | 0.004122                |
| 1:17597423 C / T<br>(rs144080386)  | <i>PADI3</i>  | p.Ala294Val        | 809                 | 121318              | 5                             | 0.006668                |
| 1:17609392 C / A<br>(rs144944758)  | <i>PADI3</i>  | p.Pro605Thr        | 51                  | 113490              | 0                             | 0.0004494               |
| 20:2312665 C / T<br>(rs779702016)  | <i>TGM3</i> * | p.Gln451*          | 1                   | 114212              | 0                             | 0.000008756             |
| 1:152084702 G / A<br>(rs201930497) | <i>TCHH</i> * | p.Gln331*          | 43                  | 112892              | 0                             | 0.0003809               |

<sup>a</sup>Variants are annotated by genomic location based on hg19, nucleotide substitution and their dbSNP IDs.\* None of the sequenced individuals in ExAC database carry a loss of function mutation in homozygous state in these genes.

**Table S6. Amino acid residues and positions<sup>#</sup> involved in the 5 calcium binding sites and the catalytic site of PADI3**

| Calcium binding sites | Residue-position                                          |
|-----------------------|-----------------------------------------------------------|
| 1                     | Gln-349 / Glu-353 / Phe-407 / Leu-410 / Glu-411           |
| 2                     | Glu-351 / Asp-369 / Ser-370 / Asn-373                     |
| 3                     | Asn-153 / Asp-155 / Asp-157 / Asp-165 / Asp-176 / Asp-179 |
| 4                     | Asp-155 / Asp-157 / Asp-179 / Asp-388                     |
| 5                     | Asp-165 / Asp-168 / His-170                               |
| Catalytic site*       | Asp-350 / His-470 / Asp-472 / Cys-646                     |

<sup>#</sup>Positions of calcium-coordinating and catalytic site residues are reported according to the PADI3 primary sequence (GenBank accession number AB026831) after a multiple alignment, as previously described.<sup>7</sup> They have been defined by analogy to the analysis of PADI4 crystal structure analysis.<sup>6</sup> \*The 4 major amino acids of the catalytic site are mentioned.

### Supplemental References

1. Nissen, C.V., and Svendsen, M.T. (2013). [Uncombable hair syndrome]. *Ugeskr Laeger* 175, 2878.
2. Novoa, A., Azon, A., and Grimalt, R. (2012). [Uncombable hair syndrome]. *An Pediatr* 77, 139-140.
3. Kilic, A., Oguz, D., Can, A., Akil, H., and Gurbuz Koz, O. (2013). A case of uncombable hair syndrome: light microscopy, trichoscopy and scanning electron microscopy. *Acta Dermatovenerol Croat* 21, 209-211.
4. Corpet, F. (1988). Multiple sequence alignment with hierarchical clustering. *Nucleic Acids Res* 16, 10881-10890.
5. Mechin, M.C., Coudane, F., Adoue, V., Arnaud, J., Duplan, H., Charveron, M., Schmitt, A.M., Takahara, H., Serre, G., and Simon, M. (2010). Deimination is regulated at multiple levels including auto-deimination of peptidylarginine deiminases. *Cell Mol Life Sci* 67, 1491-1503.
6. Arita, K., Hashimoto, H., Shimizu, T., Nakashima, K., Yamada, M., and Sato, M. (2004). Structural basis for Ca(2+)-induced activation of human PAD4. *Nat Struct Mol Biol* 11, 777-783.
7. Mechin, M.C., Sebbag, M., Arnaud, J., Nachat, R., Foulquier, C., Adoue, V., Coudane, F., Duplan, H., Schmitt, A.M., Chavanas, S., et al. (2007). Update on peptidylarginine deiminases and deimination in skin physiology and severe human diseases. *Int J Cosmet Sci* 29, 147-168.
